# Supplementary material
Source: publisher site journal article supplement (https://www.degruyterbrill.com/publication/isbn/9783805912747/downloadAsset/9783805912747_Inhaltsverzeichnis.pdf)
Supplement: Supplementary file 1 [file 9783805912747_Inhaltsverzeichnis.pdf]

# Inhaltsübersicht

|                                                                   | Seite <sup>*</sup> |
|-------------------------------------------------------------------|--------------------|
| Buch 3 · Sachenrecht                                              |                    |
| Abschnitt 2 · Allgemeine Vorschriften über Rechte an Grundstücken |                    |
| §§ 883–888 _____                                                  | 1                  |
| Sachregister _____                                                | 329                |

---

\* Zitiert wird nicht nach Seiten, sondern nach Paragraph bzw Artikel und Randnummer; siehe dazu auch „Zitierweise“.
